# Supplementary material
Source: PubMed Central journal article supplement (PMC5030686)
Supplement: ismej201633x1.pdf [file ismej201633x1.pdf]

Chasing the elusive *Euryarchaeota* class WSA2:  
genomes reveal a uniquely fastidious methyl-reducing methanogen

- Supplementary Information -

Masaru Konishi Nobu<sup>1,2</sup>, Takashi Narihiro<sup>2</sup>,  
Kyohei Kuroda<sup>1,3</sup>, Ran Mei<sup>1</sup>, and Wen-Tso Liu<sup>1</sup>

<sup>1</sup> *Department of Civil and Environmental Engineering, University of Illinois at Urbana-Champaign, 205 North Mathews Ave, Urbana, Illinois 61801*

<sup>2</sup> *Bioproduction Research Institute, National Institute of Advanced Industrial Science and Technology (AIST), Central 6, Higashi 1-1-1, Tsukuba, Ibaraki 305-8566, Japan*

<sup>3</sup> *Department of Environmental Systems Engineering, Nagaoka University of Technology, 1603-1 Kamitomioka-machi, Nagaoka, Niigata, 940-2188, Japan*

Corresponding author:

Wen-Tso Liu

Department of Civil and Environmental Engineering  
University of Illinois at Urbana-Champaign  
205 N. Mathews Ave., Urbana, IL 61801, USA  
Email: wliu@illinois.edu; TEL: +1 217 333 8442

## Supplementary Information

### Table of Contents

#### Supplementary Figures

- Supplementary Figure 1. WSA2 phylogeny based on methyl coenzyme M reductase subunit A.
- Supplementary Figure 2. 16S rRNA-based phylogeny of WSA2 (red) compared to closely related *Euryarchaeota* classes and clusters (pMC1 and MSBL1) using both Greengenes (left) and Silva v123 (right) databases.
- Supplementary Figure 3. The phylogeny of genes in the anaerobic digester WSA2 genome based on blastp against the current GenBank non-redundant protein sequence database.
- Supplementary Figure 4. Phylogeny of methylated thiol Coenzyme M methyltransferase (Mts) against associated corrinoid proteins and methanol- (MtaC) and methylamine- (MtmC, MtbC, and MttC) specific methyltransferase corrinoid proteins.

#### Supplementary Tables

- Supplementary Table 1. Genome characteristics of WSA2 extracted from metagenomes.
- Supplementary Table 2. Methanogenesis-related catabolic genes of the WSA2 genomes.
- Supplementary Table 3. Biosynthesis pathways of the WSA2 genomes.
- Supplementary Table 4. Methanogenesis cofactor biosynthesis of the WSA2 genomes.

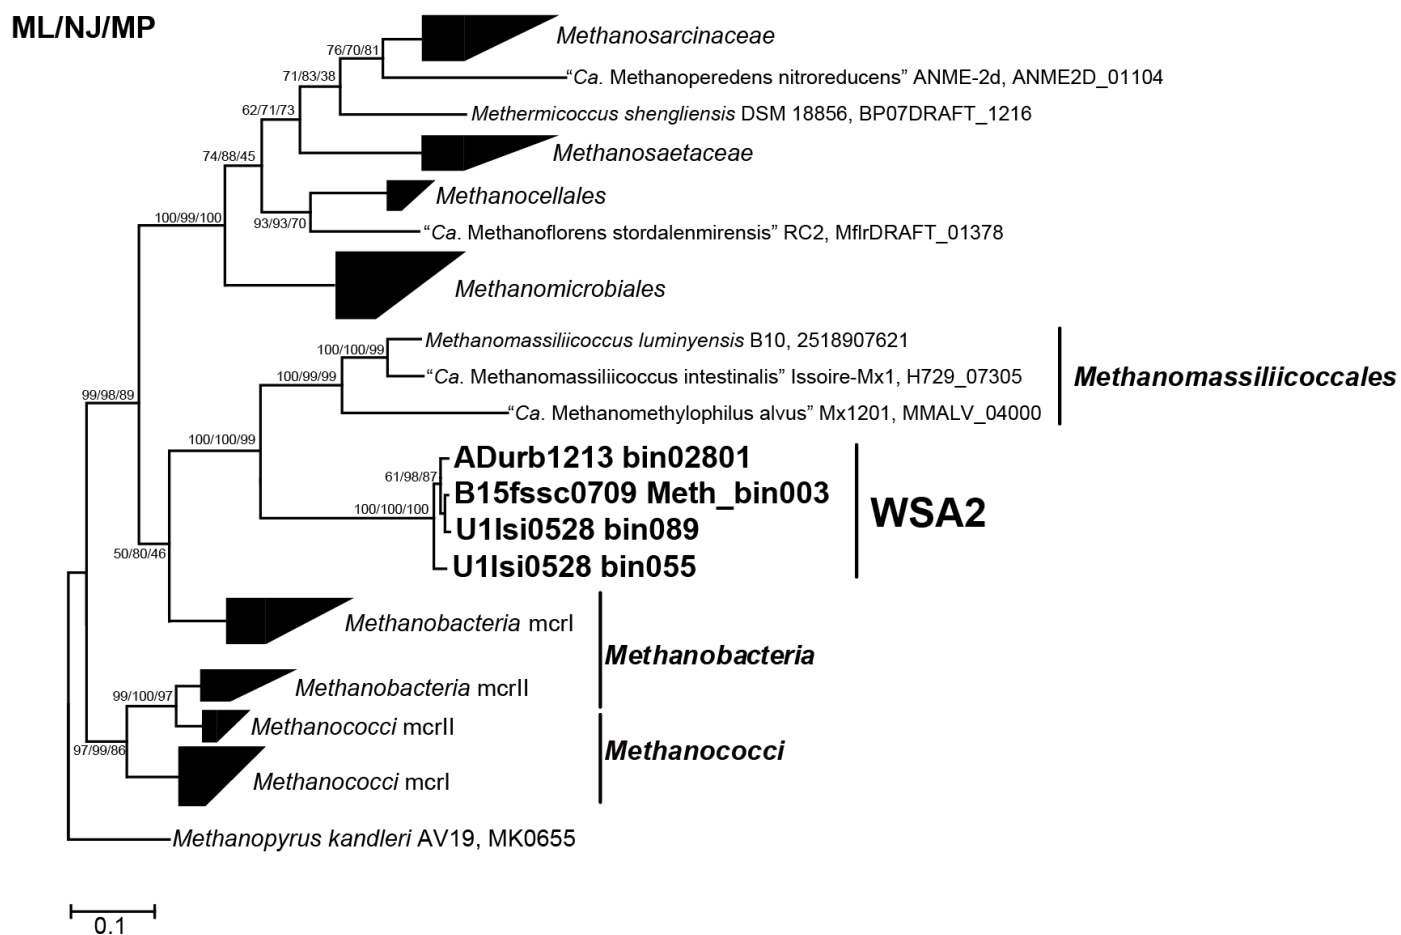

**Supplementary Figure 1.** WSA2 phylogeny based on methyl coenzyme M reductase subunit A. The tree was calculated using maximum likelihood (ML), neighbor-joining (NJ), and maximum parsimony (MP). The bootstrap values for all methods are shown. The bar indicates 10% base substitution.



**Supplementary Figure 2.** 16S rRNA-based phylogeny of WSA2 (red) compared to closely related *Euryarchaeota* classes and clusters (pMC1 and MSBL1) using both Greengenes (left) and Silva v123 (right) databases. The trees were constructed using ARB neighbor-joining algorithm with 5000 bootstrap replications, sequences at least 1200bp in length, and *Methanobacteria* as the outgroup. Bootstrap values greater than 90% (black), 75% (gray), and 50% (white) are shown. Clades corresponding to each other in the two databases are indicated. The current classification of each clade to *Thermoplasmata* (blue) and *Methanobacteria* (orange) classes are shown at the center with thick vertical bars. The renewed classification is depicted as thin adjacent lines, categorizing the sequences as *Thermoplasmata*, pMC1-MSBL1, WSA2, or *Methanobacteria*.

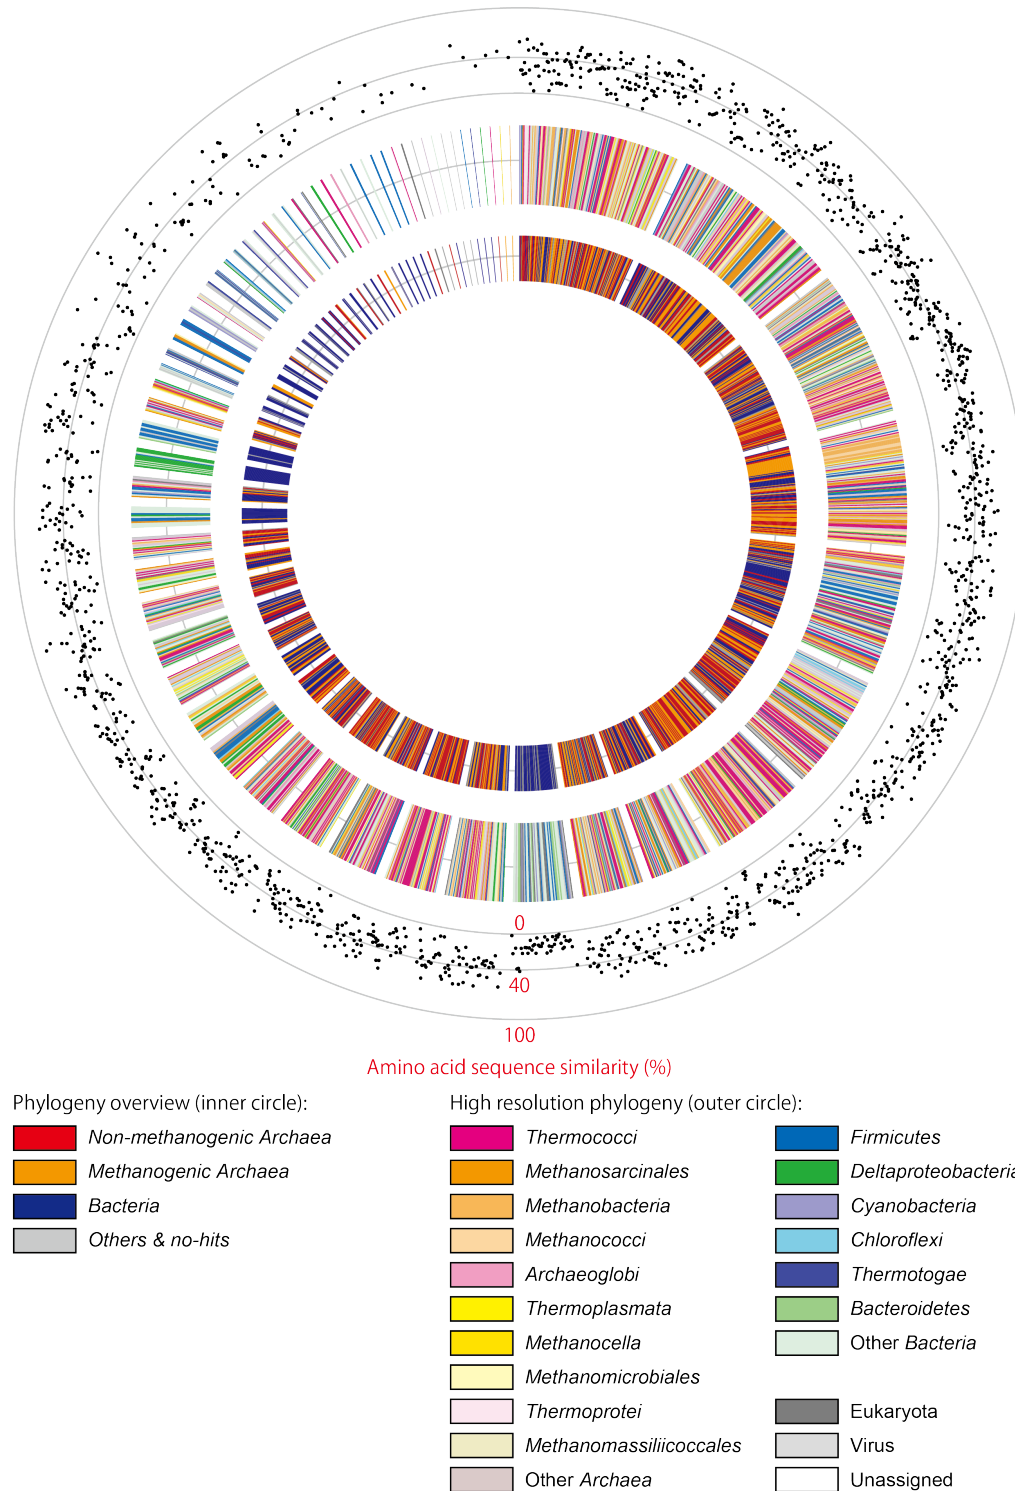

**Supplementary Figure 3.** The phylogeny of genes in the anaerobic digester WSA2 genome based on blastp against the current GenBank non-redundant protein sequence database. Contigs are shown in order of decreasing length from the top in the clock-wise direction. Genes are colored individually based on their closest phylogenetic relative using warmer and cooler colors for *Archaea* and *Bacteria* respectively at low- (domain; inner circle) and high- (ranging between phylum and order) resolution phylogenetic classification. The outer circle indicates the blastp-based similarity of the corresponding WSA2 genome to their top hit.

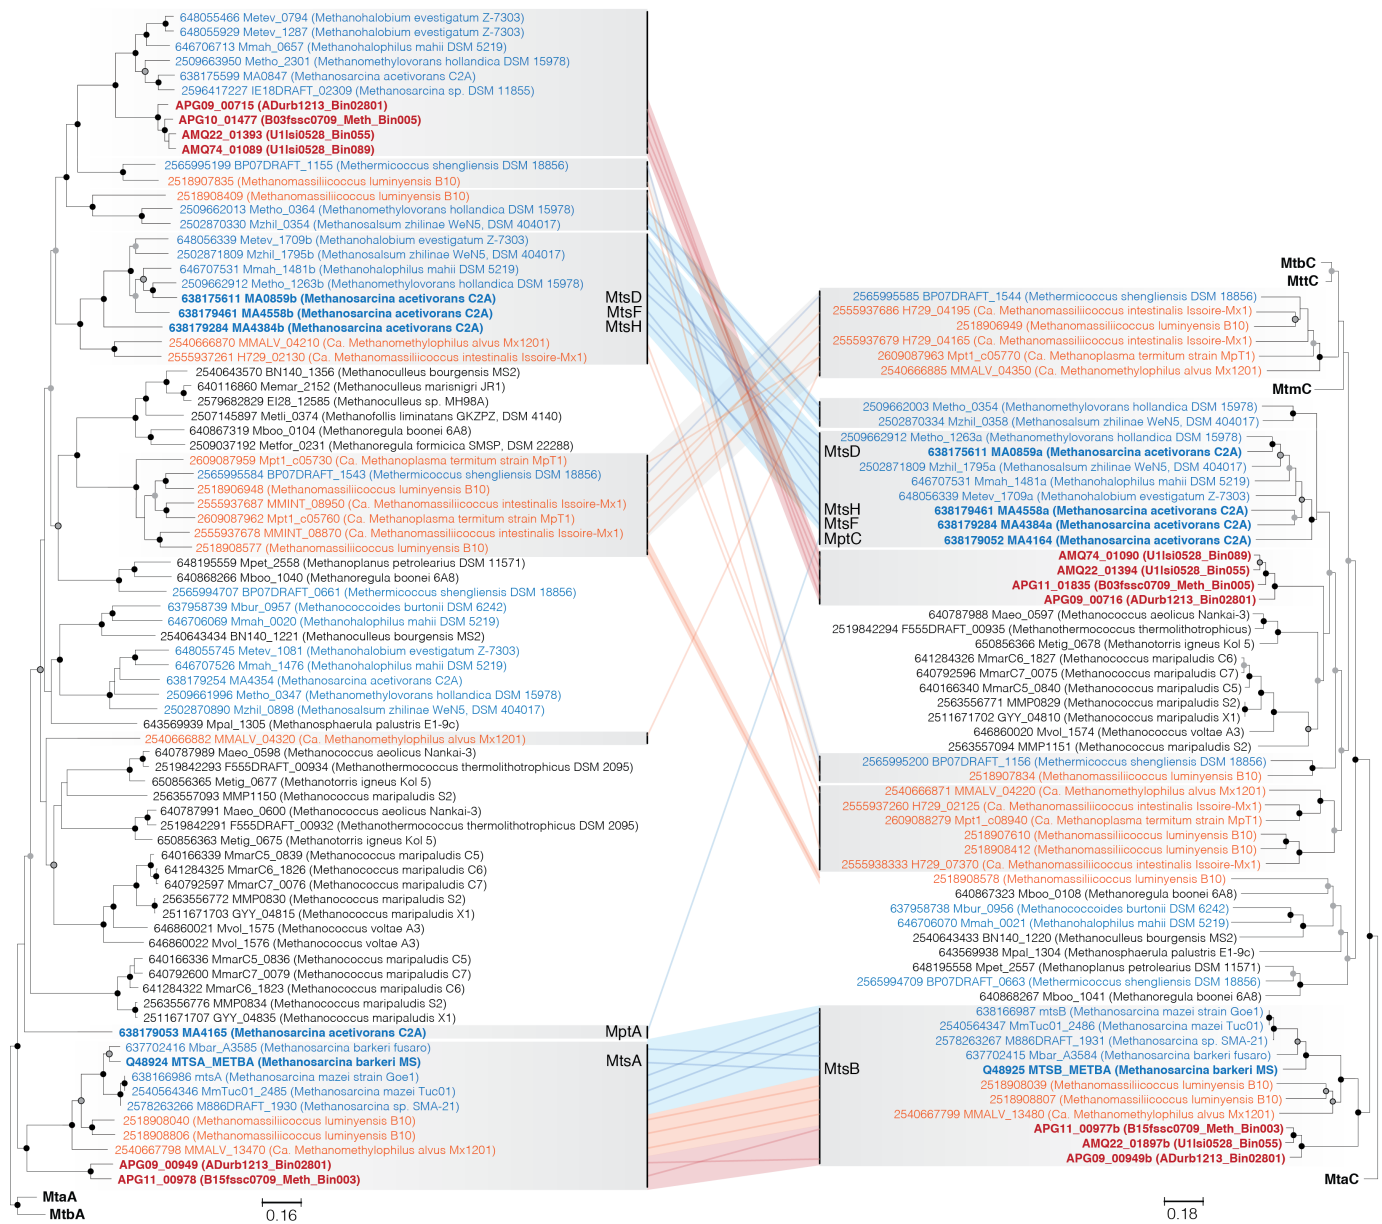

**Supplementary Figure 4.** Phylogeny of methylated thiol Coenzyme M methyltransferase (Mts) against associated corrinoid proteins and methanol- (MtaC) and methylamine- (MtmC, MtbC, and MttC) specific methyltransferase corrinoid proteins. The tree was constructed using Clustalw with default parameters for alignment and neighbor-joining clustering method for tree construction with 5000 bootstrapped replications. For Mts families associated with *Methanosarcinales* (blue), *Methanomassiliicoccales* (orange), and WSA2 (red), lines are drawn connecting neighboring methyltransferases and corrinoid proteins. For Mts families that have discernable association with specific corrinoid proteins, backgrounds are provided behind these lines. Nodes are marked for bootstrap values greater than 90% (black), 75% (gray with outline), and 50% (gray).

Supplementary Table 1. Genome characteristics of WSA2 extracted from metagenomes of an anaerobic digester (AD) in Urbana, Illinois and full-scale and lab-scale purified terephthalic acid (PTA) process wastewater-treating methanogenic bioreactors. Genomes were identified for four WSA2 populations and one representative genome was selected for each WSA2 population (bolded). Bins (or strains) from the same population in different samples (i.e., time points for Urbana AD and reactor depths for Full-scale PTA) (marked with \*) are shown with estimated genome completeness calculated using 40 marker genes. (abbreviations: CDS - coding sequence)

|                        | <b>ADurb1213_</b><br><b>Bin02801</b> | ADurb1013_Bin<br>02101* | ADurb1113_Bin<br>01801* | <b>B15fssc0709_M</b><br><b>eth_Bin003</b> | B03fssc0709_Me<br>th_Bin005* | BMIXfssc0709_<br>Meth_Bin006* | <b>U11si0528_</b><br><b>Bin055</b> | <b>U11si0528_</b><br><b>Bin089</b> |
|------------------------|--------------------------------------|-------------------------|-------------------------|-------------------------------------------|------------------------------|-------------------------------|------------------------------------|------------------------------------|
| Source                 | Urbana AD                            |                         |                         | Full-scale PTA                            |                              |                               | Lab-scale PTA                      | Lab-scale PTA                      |
| Accession Number       | LNJE00000000                         | LNJB00000000            | LNJD00000000            | LNGF00000000                              | LNGE00000000                 | LNJC00000000                  | LNGC00000000                       | LNGD00000000                       |
| Locus Tag              | APG09                                | AN188                   | APG08                   | APG11                                     | APG10                        | APG12                         | AMQ22                              | AMQ74                              |
| Genome Size (Mb)       | 1482299                              | 1495432                 | 1497132                 | 1659905                                   | 1610745                      | 1557731                       | 1994208                            | 1794529                            |
| G+C (%)                | 32.9                                 | 33.2                    | 33.2                    | 34.6                                      | 34.3                         | 34.5                          | 35.4                               | 34.1                               |
| Contigs                | 66                                   | 77                      | 60                      | 76                                        | 87                           | 61                            | 306                                | 313                                |
| Max Contig Length (kb) | 133838                               | 211347                  | 177638                  | 97942                                     | 72872                        | 118394                        | 54809                              | 52116                              |
| N50                    | 80261                                | 51722                   | 67697                   | 34825                                     | 27886                        | 34208                         | 11053                              | 10190                              |
| N90                    | 17554                                | 11451                   | 17402                   | 10145                                     | 10054                        | 13090                         | 2665                               | 2281                               |
| Gene                   | 1632                                 | 1635                    | 1644                    | 1887                                      | 1838                         | 1769                          | 2328                               | 2000                               |
| CDS                    | 1585                                 | 1591                    | 1597                    | 1845                                      | 1802                         | 1732                          | 2291                               | 1964                               |
| tRNA                   | 44                                   | 41                      | 43                      | 39                                        | 34                           | 36                            | 35                                 | 34                                 |
| rRNA                   | 3                                    | 3                       | 4                       | 3                                         | 2                            | 3                             | 2                                  | 2                                  |
| Est. Completeness (%)  | 92.5                                 | 92.5                    | 92.5                    | 92.5                                      | 92.5                         | 92.5                          | 90                                 | 85                                 |
| Genome Overlap (Mb)    | n/a                                  | 1328761                 | 1354711                 | n/a                                       | 1470664                      | 1498838                       | n/a                                | n/a                                |
| Overlapping Contigs    | n/a                                  | 55                      | 47                      | n/a                                       | 79                           | 55                            | n/a                                | n/a                                |
| Overlapping CDS        | n/a                                  | 1375 (88%)              | 1396 (89%)              | n/a                                       | 1679 (90%)                   | 1668 (90%)                    | n/a                                | n/a                                |



Supplementary Table 2. Methanogenesis-related catabolic genes of the WSA2 genomes, including core genes (black), genes found in only some genomes (blue), and genes missing from all genomes

| Function                               | Abbr                                                                 | ADurb1213_Bin02801                      | B15fssc0709 | U11si0528_Bin055 | U11si0528_Bin089 |             |
|----------------------------------------|----------------------------------------------------------------------|-----------------------------------------|-------------|------------------|------------------|-------------|
| Mcr complex                            | Methyl-CoM reductase I subunit beta                                  | mcrB                                    | APG09_00777 | APG11_01871      | AMQ22_00305      | #N/A        |
|                                        | Methyl-CoM reductase I operon protein D                              | mcrD                                    | APG09_00776 | APG11_00758      | AMQ22_00304      | AMQ74_00970 |
|                                        | Methyl-CoM reductase I subunit gamma                                 | mcrG                                    | APG09_00775 | APG11_00759      | AMQ22_00303      | AMQ74_00969 |
|                                        | Methyl-CoM reductase I subunit alpha                                 | mcrA                                    | APG09_00774 | APG11_00760      | AMQ22_00302      | AMQ74_00968 |
|                                        | Methyl-CoM reductase I operon protein C                              | mcrC                                    | APG09_00807 | #N/A             | #N/A             | #N/A        |
| Methylthiol metabolism                 | Methylthiol-coenzyme M methyltransferase - corrinoind fusion protein | MtsA                                    | APG09_00949 | APG11_00978      | AMQ22_01897      | #N/A        |
|                                        | Methyltransferase corrinoind protein reductive activase              | MtlD                                    | APG09_00713 | APG11_01859      | AMQ22_01391      | AMQ74_01087 |
|                                        | MtaA-related methylcobamide:CoM methyltransferase                    | MtlB                                    | APG09_00714 | APG11_01858      | AMQ22_01392      | AMQ74_01088 |
|                                        | Methylthiol-coenzyme M methyltransferase                             | MtlA                                    | APG09_00715 | APG11_01477      | AMQ22_01393      | AMQ74_01089 |
|                                        | Corrinoind protein                                                   | MtlC                                    | APG09_00716 | APG11_01835      | AMQ22_01394      | AMQ74_01090 |
| HdrABC-MvhDGA hydrogenase              | Heterodisulfide reductase subunit A                                  | HdrA                                    | APG09_00680 | APG11_01207      | AMQ22_00755      | #N/A        |
|                                        | Heterodisulfide reductase subunit C                                  | HdrC                                    | APG09_00679 | APG11_01208      | AMQ22_00754      | AMQ74_01710 |
|                                        | Heterodisulfide reductase subunit B                                  | HdrB                                    | APG09_00678 | APG11_01209      | AMQ22_00753      | AMQ74_01709 |
|                                        | F420-non-reducing hydrogenase iron-sulfur subunit D                  | MvhD                                    | APG09_00677 | APG11_01210      | AMQ22_00752      | AMQ74_01708 |
|                                        | Hydrogenase 2 maturation endopeptidase                               |                                         | APG09_00676 | APG11_01211      | AMQ22_00751      | AMQ74_01707 |
|                                        | F420-non-reducing hydrogenase iron-sulfur subunit A                  | MvhA                                    | APG09_01330 | APG11_00305      | AMQ22_00322      | #N/A        |
|                                        | F420-non-reducing hydrogenase iron-sulfur subunit G                  | MvhG                                    | APG09_01329 | APG11_00306      | AMQ22_00321      | #N/A        |
| HdrABC-MvhDGA hydrogenase              | Heterodisulfide reductase subunit A                                  | HdrA                                    | #N/A        | #N/A             | AMQ22_00324      | #N/A        |
|                                        | F420-non-reducing hydrogenase iron-sulfur subunit D                  | MvhD                                    | #N/A        | #N/A             | AMQ22_00323      | #N/A        |
|                                        | F420-non-reducing hydrogenase iron-sulfur subunit G                  | MvhG                                    | #N/A        | #N/A             | AMQ22_00322      | #N/A        |
|                                        | F420-non-reducing hydrogenase iron-sulfur subunit A                  | MvhA                                    | #N/A        | #N/A             | AMQ22_00321      | #N/A        |
|                                        | Heterodisulfide reductase subunit C                                  | HdrC                                    | #N/A        | #N/A             | AMQ22_00320      | AMQ74_01220 |
|                                        | Heterodisulfide reductase subunit B                                  | HdrB                                    | #N/A        | #N/A             | AMQ22_00319      | AMQ74_01221 |
| Other Hdr                              | Heterodisulfide reductase subunit A                                  | HdrA                                    | APG09_00907 | #N/A             | AMQ22_01655      | #N/A        |
|                                        | Heterodisulfide reductase subunit A                                  | HdrA                                    | APG09_00225 | #N/A             | #N/A             | #N/A        |
|                                        | Heterodisulfide reductase subunit D                                  | HdrD                                    | APG09_01421 | #N/A             | #N/A             | #N/A        |
| Envergy-converting hydrogenase Ehb     | energy-converting hydrogenase B subunit A                            | EhbA                                    | APG09_00460 | APG11_00234      | AMQ22_01802      | #N/A        |
|                                        | energy-converting hydrogenase B subunit B                            | EhbB                                    | APG09_00459 | APG11_00233      | AMQ22_01803      | #N/A        |
|                                        | energy-converting hydrogenase B subunit C                            | EhbC                                    | APG09_00458 | APG11_00232      | AMQ22_01804      | #N/A        |
|                                        | energy-converting hydrogenase B subunit D                            | EhbD                                    | APG09_00457 | APG11_00231      | AMQ22_01805      | #N/A        |
|                                        | energy-converting hydrogenase B subunit E                            | EhbE                                    | APG09_00456 | APG11_00230      | AMQ22_01806      | #N/A        |
|                                        | energy-converting hydrogenase B subunit F                            | EhbF                                    | APG09_00455 | APG11_00229      | #N/A             | #N/A        |
|                                        | energy-converting hydrogenase B subunit G                            | EhbG                                    | APG09_00454 | APG11_00228      | AMQ22_01964      | #N/A        |
|                                        | energy-converting hydrogenase B subunits H and I fusion protein      | EhbHI                                   | APG09_00453 | APG11_00227      | AMQ22_01965      | AMQ74_01530 |
|                                        | energy-converting hydrogenase B subunit J                            | EhbJ                                    | APG09_00452 | APG11_00226      | AMQ22_01966      | AMQ74_01529 |
|                                        | energy-converting hydrogenase B subunit K, polyferredoxin            | EhbK                                    | APG09_00451 | APG11_00225      | AMQ22_01967      | AMQ74_01528 |
|                                        | energy-converting hydrogenase B subunit K, polyferredoxin            | EhbK                                    | APG09_00450 | APG11_00224      | AMQ22_01968      | AMQ74_01527 |
|                                        | energy-converting hydrogenase B subunit L                            | EhbL                                    | APG09_00449 | APG11_00223      | AMQ22_01969      | AMQ74_01526 |
|                                        | energy-converting hydrogenase B subunit M                            | EhbM                                    | APG09_00448 | APG11_00222      | #N/A             | AMQ74_01525 |
|                                        | energy-converting hydrogenase B subunit N, hydrogenase large subunit | EhbN                                    | APG09_00447 | APG11_00221      | #N/A             | #N/A        |
|                                        | energy-converting hydrogenase B subunit O                            | EhbO                                    | APG09_00446 | APG11_00220      | AMQ22_00985      | #N/A        |
|                                        | energy-converting hydrogenase B subunit P                            | EhbP                                    | APG09_00445 | APG11_00219      | AMQ22_00984      | AMQ74_01647 |
|                                        | F420 hydrogenase                                                     | Coenzyme F420 hydrogenase subunit alpha | FrhA        | APG09_00532      | APG11_00938      | AMQ22_01241 |
| Hydrogenase 3 maturation protease      |                                                                      |                                         | APG09_00531 | APG11_00939      | AMQ22_01242      | AMQ74_00802 |
| Coenzyme F420 hydrogenase subunit beta |                                                                      | FrhB                                    | APG09_00530 | APG11_00940      | AMQ22_01243      | AMQ74_00803 |

Supplementary Table 3. Biosynthesis pathways of the WSA2 genomes, including core genes (black), genes found in only some genomes (blue), and genes missing from all genomes

| Function                                    | Abbr                                                                                   | ADurb1213_Bin02801 | B15isc0709  | U1lsi0528_Bin055 | U1lsi0528_Bin089 |
|---------------------------------------------|----------------------------------------------------------------------------------------|--------------------|-------------|------------------|------------------|
| Methylmalonyl-CoA pathway                   | methylmalonyl-CoA carboxyltransferase                                                  | APG09_00568        | APG11_01543 | AMQ22_01538      | AMQ74_01179      |
|                                             | sodium ion-translocating decarboxylase, gamma subunit                                  | APG09_00569        | APG11_01544 | AMQ22_01537      | AMQ74_01180      |
|                                             | decarboxylase biotin/lipoyl attachment domain-containing protein                       | APG09_00570        | APG11_01545 | AMQ22_01536      | AMQ74_01181      |
|                                             | sodium ion-translocating decarboxylase, beta subunit                                   | APG09_00571        | APG11_01546 | AMQ22_01535      | AMQ74_01182      |
|                                             | decarboxylase biotin/lipoyl attachment domain-containing protein                       | APG09_00572        | APG11_01547 | AMQ22_01534      | AMQ74_01183      |
|                                             | methylmalonyl-CoA mutase                                                               | APG09_01502        | APG11_01040 | AMQ22_00728      | AMQ74_01184      |
|                                             | methylmalonyl-CoA epimerase                                                            | APG09_01504        | APG11_01232 | AMQ22_00730      | AMQ74_01095      |
|                                             | malonate-semialdehyde dehydrogenase (acetylating)                                      | mmsA APG09_01420   | APG11_00891 | AMQ22_02031      | AMQ74_00935      |
| Tricarboxylic acid cycle                    | citrate synthase                                                                       | CS APG09_00144     | APG11_01242 | AMQ22_00720      | AMQ74_00795      |
|                                             | aconitate hydratase                                                                    | APG09_00880        | APG11_00984 | AMQ22_00836      | AMQ74_01300      |
|                                             | isocitrate dehydrogenase                                                               | APG09_00881        | APG11_00983 | #N/A             | AMQ74_01301      |
|                                             | 2-oxoglutarate ferredoxin oxidoreductase                                               | korA AN188_01327   | APG11_00418 | AMQ22_01047      | #N/A             |
|                                             | 2-oxoglutarate ferredoxin oxidoreductase                                               | korB AN188_01326   | APG11_00419 | AMQ22_01048      | AMQ74_01919      |
|                                             | 2-oxoglutarate ferredoxin oxidoreductase                                               | korC AN188_01325   | APG11_00420 | AMQ22_01049      | AMQ74_01918      |
|                                             | succinyl-CoA synthase                                                                  | APG09_00860        | APG11_01090 | #N/A             | AMQ74_00411      |
|                                             | fumarate hydratase                                                                     | fumA APG09_01332   | APG11_00302 | AMQ22_00326      | AMQ74_01058      |
|                                             | fumarate hydratase                                                                     | fumB APG09_01333   | APG11_00301 | AMQ22_00327      | AMQ74_01057      |
|                                             | fumarate reductase                                                                     | APG09_00204        | APG11_00310 | AMQ22_00317      | AMQ74_01223      |
| malate dehydrogenase                        | APG09_01334                                                                            | APG11_00300        | AMQ22_00328 | AMQ74_01056      |                  |
| Pyruvate                                    | pyruvate carboxylase                                                                   | pyc APG09_01380    | APG11_00441 | AMQ22_01678      | AMQ74_00644      |
|                                             | acetyl-CoA carboxylase [Meiothermus taiwanensis]                                       | APG09_00590        | APG11_01289 | AMQ22_00133      | AMQ74_00454      |
| Malonate                                    | acetyl-CoA carboxylase biotin carboxylase subunit [Brevibacillus sp. BC25]             | APG09_00588        | #N/A        | AMQ22_00135      | AMQ74_01139      |
|                                             | malonate decarboxylase acyl carrier protein [Enterorhabdus caecimuris]                 | APG09_00587        | APG11_00171 | AMQ22_00136      | AMQ74_01140      |
|                                             | malonate decarboxylase, beta subunit [Enterorhabdus caecimuris]                        | APG09_00586        | #N/A        | AMQ22_00137      | AMQ74_01141      |
|                                             | malonate decarboxylase gamma subunit [Phascolarctobacterium sp. CAG:207]               | APG09_00585        | #N/A        | AMQ22_00138      | AMQ74_01142      |
|                                             | holo-ACP synthase, malonate decarboxylase-specific [Pelosinus fermentans]              | APG09_00583        | APG11_01561 | AMQ22_00140      | AMQ74_01144      |
| Glycolysis (incomplete)                     | fructose-1,6-bisphosphatase                                                            | APG09_00327        | APG11_01410 | AMQ22_01108      | AMQ74_00432      |
|                                             | fructose-1,6-bisphosphate aldolase                                                     | #N/A               | #N/A        | #N/A             | #N/A             |
|                                             | glyceraldehyde-3-phosphate dehydrogenase [Thermococcus kodakarensis]                   | APG09_01155        | APG11_01358 | AMQ22_00415      | AMQ74_01415      |
|                                             | phosphoglyceromutase                                                                   | APG09_00160        | APG11_01107 | AMQ22_00835      | AMQ74_00427      |
| phosphoenolpyruvate synthase                | APG09_00111                                                                            | APG11_00329        | AMQ22_00966 | AMQ74_00017      |                  |
| Pentose phosphate pathway (some incomplete) | transketolase                                                                          | #N/A               | APG11_01152 | #N/A             | #N/A             |
|                                             | ribulose-phosphate 3-epimerase                                                         | #N/A               | APG11_01155 | #N/A             | #N/A             |
|                                             | transaldolase                                                                          | #N/A               | APG11_01154 | #N/A             | #N/A             |
|                                             | 3-hexulose-6-phosphate synthase [Thermoplasmatales archaeon SCGC AB-540-F20]           | APG09_00091        | APG11_00349 | AMQ22_00405      | AMQ74_00037      |
| ribose-5-phosphate isomerase                | APG09_01390                                                                            | APG11_00430        | AMQ22_02156 | AMQ74_00833      |                  |
| Aspartate & Asparagine                      | aminotransferase [Thermococcus barophilus]                                             | APG09_00020        | APG11_01170 | AMQ22_00338      | AMQ74_00212      |
|                                             | asparagine synthase                                                                    | APG09_01393        | APG11_00427 | AMQ22_01057      | AMQ74_00830      |
| Glutamate / Glutamine / Arginine            | aminotransferase [Thermococcus barophilus]                                             | APG09_00020        | APG11_01170 | AMQ22_00338      | AMQ74_00212      |
|                                             | glutamine synthetase [Methanothermobacter thermotrophicus CaT2]                        | glnA APG09_00477   | APG11_00258 | AMQ22_00506      | AMQ74_01080      |
|                                             | glutamate N-acetyltransferase / amino-acid N-acetyltransferase                         | argJ APG09_00363   | APG11_00551 | AMQ22_01506      | AMQ74_00055      |
|                                             | acetylglutamate/LysW-gamma-L-alpha-aminoadipate kinase                                 | lysZ APG09_00663   | APG11_01224 | AMQ22_00738      | AMQ74_00719      |
|                                             | N-acetyl-gamma-glutamyl-phosphate reductase                                            | argC APG09_00664   | APG11_01223 | AMQ22_00739      | AMQ74_00718      |
|                                             | acetylornithine aminotransferase [Herpetosiphon aurantiacus]                           | argD APG09_00662   | APG11_01225 | AMQ22_00737      | AMQ74_00720      |
|                                             | acetylornithine deacetylase                                                            | argE APG09_00661   | APG11_01226 | AMQ22_00736      | AMQ74_00721      |
|                                             | argininosuccinate synthase                                                             | APG09_00171        | #N/A        | #N/A             | #N/A             |
|                                             | argininosuccinate lyase                                                                | APG09_00170        | #N/A        | #N/A             | #N/A             |
| arginase                                    | APG09_00700                                                                            | #N/A               | #N/A        | #N/A             |                  |
| Proline (incomplete)                        | ornithine cyclodeaminase                                                               | #N/A               | #N/A        | #N/A             | #N/A             |
|                                             | pyrroline-5-carboxylate reductase                                                      | #N/A               | APG11_00064 | #N/A             | #N/A             |
| Lysine                                      | ornithine carbamoyltransferase                                                         | argF APG09_00790   | APG11_00179 | AMQ22_00526      | AMQ74_00950      |
|                                             | argininosuccinate synthase                                                             | argG APG09_01034   | APG11_01054 | AMQ22_00895      | AMQ74_00917      |
|                                             | aminotransferase                                                                       | AN188_00355        | APG11_00956 | AMQ22_01308      | AMQ74_00509      |
|                                             | alpha-aminoadipate-lysW ligase                                                         | lysX APG09_00665   | APG11_01222 | AMQ22_00740      | AMQ74_00717      |
|                                             | acetylglutamate/LysW-gamma-L-alpha-aminoadipate kinase                                 | lysZ APG09_00663   | APG11_01224 | AMQ22_00738      | AMQ74_00719      |
|                                             | N-acetyl-gamma-glutamyl-phosphate/LysW-gamma-L-alpha-aminoadipyl-6-phosphate reductase | lysY APG09_00664   | APG11_01223 | AMQ22_00739      | AMQ74_00718      |
|                                             | acetylornithine/lysW-gamma-L-lysine aminotransferase                                   | lysJ APG09_00662   | APG11_01225 | AMQ22_00737      | AMQ74_00720      |
|                                             | LysW-gamma-L-lysine carboxypeptidase                                                   | lysK APG09_00661   | APG11_01226 | AMQ22_00736      | AMQ74_00721      |
| Homoserine & Threonine (incomplete)         | aspartate kinase                                                                       | #N/A               | #N/A        | #N/A             | #N/A             |
|                                             | aspartate-semialdehyde dehydrogenase                                                   | APG09_00102        | APG11_00338 | AMQ22_01145      | AMQ74_00026      |
|                                             | homoserine dehydrogenase                                                               | APG09_00104        | APG11_00336 | AMQ22_01143      | AMQ74_00024      |
|                                             | homoserine kinase                                                                      | #N/A               | #N/A        | #N/A             | #N/A             |
| threonine synthase                          | thrC APG09_00533                                                                       | APG11_00937        | AMQ22_01240 | AMQ74_00804      |                  |
| Serine                                      | 2-hydroxyacid dehydrogenase                                                            | APG09_00174        | APG11_01674 | AMQ22_02272      | #N/A             |
|                                             | phosphoserine phosphatase                                                              | APG09_01032        | APG11_01052 | AMQ22_00897      | AMQ74_00915      |
| Tyrosine & Phenylalanine (some incomplete)  | Transketolase                                                                          | #N/A               | APG11_01152 | #N/A             | #N/A             |
|                                             | 3-deoxy-7-phosphoheptulonate synthase                                                  | aroF APG09_01016   | APG11_01688 | AMQ22_01758      | AMQ74_01878      |
|                                             | 3-dehydroquinate synthase                                                              | aroB APG09_01015   | APG11_01687 | AMQ22_01757      | AMQ74_01652      |
|                                             | 3-dehydroquinate dehydratase / shikimate dehydrogenase                                 | aroDE APG09_01014  | APG11_01686 | AMQ22_01756      | AMQ74_01653      |
|                                             | shikimate kinase                                                                       | aroK APG09_01012   | APG11_01684 | AMQ22_01754      | AMQ74_01958      |
|                                             | 3-phosphoshikimate 1-carboxyvinyltransferase                                           | aroA APG09_01013   | APG11_01685 | AMQ22_01755      | #N/A             |
|                                             | chorismate synthase                                                                    | aroC APG09_01011   | APG11_01683 | #N/A             | #N/A             |
|                                             | chorismate mutase                                                                      | APG09_01018        | APG11_01690 | AMQ22_01822      | AMQ74_01843      |
|                                             | prephenate dehydrogenase                                                               | APG09_01010        | APG11_01682 | AMQ22_02004      | AMQ74_00756      |

|                                                          |                                                                                                    |                      |             |                    |             |                    |
|----------------------------------------------------------|----------------------------------------------------------------------------------------------------|----------------------|-------------|--------------------|-------------|--------------------|
|                                                          | prephenate dehydratase                                                                             | pheA2                | APG09_01007 | APG11_01681        | AMQ22_02003 | AMQ74_00755        |
|                                                          | ribose-phosphate pyrophosphokinase                                                                 |                      | AN188_00029 | APG11_00975        | #N/A        | AMQ74_00714        |
|                                                          | ATP phosphoribosyltransferase                                                                      | hisG                 | APG09_00872 | APG11_00996        | AMQ22_00846 | AMQ74_00597        |
|                                                          | phosphoribosyl-ATP pyrophosphohydrolase / phosphoribosyl-AMP cyclohydrolase                        | hisIE                | APG09_01055 | APG11_01075        | AMQ22_01025 | <b>AMQ74_00113</b> |
| Histidine                                                | 1-(5-phosphoribosyl)-5-[(5-phosphoribosylamino)methylideneamino] imidazole-4-carboxamide isomerase | hisA                 | APG09_01058 | APG11_01078        | AMQ22_01022 | AMQ74_00110        |
|                                                          | imidazole glycerol phosphate synthase [Methanofollis liminatans]                                   |                      | APG09_01059 | APG11_01079        | AMQ22_01021 | AMQ74_00109        |
|                                                          | imidazole glycerol phosphate synthase                                                              | hisF                 | APG09_01056 | APG11_01076        | AMQ22_01024 | AMQ74_00112        |
|                                                          | histidinol-phosphate aminotransferase                                                              | hisC                 | APG09_01060 | APG11_01080        | AMQ22_01020 | #N/A               |
|                                                          | imidazoleglycerol-phosphate dehydratase / histidinol phosphatase                                   | hisB                 | APG09_01057 | APG11_01077        | AMQ22_01023 | AMQ74_00111        |
|                                                          | histidinol dehydrogenase                                                                           | hisD                 | APG09_01061 | APG11_01081        | AMQ22_01019 | AMQ74_00107        |
|                                                          | Acetolactate synthase                                                                              | ilvB                 | APG09_00658 | APG11_00407        | AMQ22_00446 | AMQ74_00724        |
| Isoleucine,<br>Leucine, &<br>Valine (some<br>incomplete) | ketol-acid reductoisomerase                                                                        | ilvC                 | #N/A        | APG11_00405        | AMQ22_00448 | AMQ74_00726        |
|                                                          | dihydroxy-acid dehydratase                                                                         | ilvD                 | APG09_00654 | APG11_00400        | AMQ22_00453 | AMQ74_01386        |
|                                                          | 2-isopropylmalate synthase                                                                         |                      | APG09_00655 | APG11_00401        | AMQ22_00452 | AMQ74_01385        |
|                                                          | 2-isopropylmalate isomerase                                                                        |                      | #N/A        | APG11_00403        | AMQ22_00450 | AMQ74_00728        |
|                                                          | 3-isopropylmalate dehydratase large subunit                                                        |                      | APG09_00667 | APG11_01220        | AMQ22_00742 | AMQ74_01276        |
|                                                          | 3-isopropylmalate dehydratase small subunit                                                        |                      | APG09_00668 | APG11_01219        | AMQ22_00743 | AMQ74_01277        |
|                                                          | isocitrate/isopropylmalate dehydrogenase                                                           |                      | #N/A        | <b>APG11_01221</b> | <b>#N/A</b> | <b>#N/A</b>        |
|                                                          |                                                                                                    | ammonium transporter |             | #N/A               | APG11_00473 | #N/A               |
| Transporters                                             | ribose ABC transporter ATP-binding protein                                                         |                      | #N/A        | APG11_00519        | AMQ22_01098 | #N/A               |
|                                                          | sugar transporter                                                                                  |                      | #N/A        | APG11_00883        | AMQ22_02115 | AMQ74_00342        |
|                                                          | arabinose ABC transporter permease                                                                 |                      | #N/A        | #N/A               | #N/A        | AMQ74_00888        |
|                                                          | sugar ABC transporter ATPase                                                                       |                      | #N/A        | #N/A               | #N/A        | AMQ74_01640        |
|                                                          | citrate transporter                                                                                |                      | APG09_00856 | APG11_01087        | AMQ22_00815 | AMQ74_00408        |
|                                                          | polysaccharide ABC transporter ATP-binding protein                                                 |                      | #N/A        | APG11_01568        | #N/A        | #N/A               |
|                                                          | C4-dicarboxylate ABC transporter subunit                                                           |                      | #N/A        | #N/A               | AMQ22_00588 | #N/A               |
|                                                          | branched-chain amino acid ABC transporter                                                          |                      | APG09_01366 | APG11_00784        | AMQ22_00277 | AMQ74_00327        |
|                                                          | amino acid ABC transporter substrate-binding protein                                               |                      | APG09_01367 | APG11_00783        | AMQ22_00278 | #N/A               |
|                                                          | peptide ABC transporter ATP-binding protein                                                        |                      | #N/A        | APG11_01024        | AMQ22_01596 | #N/A               |
|                                                          | glutamine ABC transporter permease                                                                 |                      | #N/A        | APG11_01025        | AMQ22_01595 | AMQ74_01832        |
|                                                          | ABC transporter substrate-binding protein                                                          |                      | #N/A        | APG11_01026        | AMQ22_01593 | AMQ74_01833        |
|                                                          | cation transporter                                                                                 |                      | #N/A        | APG11_01029        | #N/A        | #N/A               |
|                                                          | peptide ABC transporter substrate-binding protein                                                  |                      | APG09_00231 | #N/A               | #N/A        | #N/A               |
|                                                          | peptide ABC transporter permease                                                                   |                      | APG09_00233 | #N/A               | AMQ22_02103 | AMQ74_00634        |
|                                                          | peptide ABC transporter permease                                                                   |                      | APG09_00234 | #N/A               | #N/A        | AMQ74_00633        |
|                                                          | oligopeptide/dipeptide transporter, ATP-binding protein                                            |                      | APG09_00235 | #N/A               | #N/A        | AMQ74_00632        |
|                                                          | peptide ABC transporter, ATP-binding protein                                                       |                      | APG09_00236 | #N/A               | #N/A        | AMQ74_00631        |
|                                                          | peptide ABC transporter substrate-binding protein                                                  |                      | #N/A        | #N/A               | #N/A        | AMQ74_01962        |
|                                                          | glutamine ABC transporter ATP-binding protein                                                      |                      | #N/A        | #N/A               | #N/A        | #N/A               |
|                                                          | glutamine ABC transporter permease                                                                 |                      | #N/A        | #N/A               | #N/A        | AMQ74_01832        |
|                                                          | sulfonate transporter                                                                              |                      | APG09_00054 | APG11_01537        | AMQ22_00745 | AMQ74_01279        |
|                                                          | sulfonate transporter                                                                              |                      | APG09_00055 | APG11_01538        | AMQ22_01913 | AMQ74_00234        |
|                                                          | sulfonate transporter                                                                              |                      | APG09_00670 | APG11_01217        | #N/A        | AMQ74_00235        |

Supplementary Table 4. Methanogenesis cofactor biosynthesis of the WSA2 genomes, including core genes (black), genes found in only some genomes (blue), and genes missing from all genomes

|                                  | Function                                              | Abbr        | ADurb1213_Bin02801 | B15fssc0709 | U1lsi0528_Bin055 | U1lsi0528_Bin089 |
|----------------------------------|-------------------------------------------------------|-------------|--------------------|-------------|------------------|------------------|
| Cobamide /<br>F430<br>synthesis  | Glutamyl-tRNA reductase                               | HemA        | APG09_00239        | APG11_00898 | AMQ22_00477      | AMQ74_00686      |
|                                  | glutamate-1-semialdehyde 2,1-aminomutase              | HemL        | APG09_00440        | APG11_00214 | AMQ22_00979      | AMQ74_01568      |
|                                  | delta-aminolevulinic acid dehydratase                 | HemB        | APG09_00240        | APG11_00899 | AMQ22_00478      | AMQ74_00687      |
|                                  | porphobilinogen deaminase                             | HemC        | APG09_00441        | APG11_00215 | AMQ22_00980      | AMQ74_01643      |
|                                  | Uroporphyrinogen-III C-methyltransferase              | CobA        | APG09_00442        | APG11_00216 | AMQ22_00981      | AMQ74_01644      |
|                                  | precorrin-2 dehydrogenase                             | CysG        | APG09_00238        | APG11_00897 | AMQ22_00476      | AMQ74_00685      |
|                                  | Sirohydrochlorin cobaltochelatase                     | CbiX        | APG09_00244        | APG11_00903 | AMQ22_00482      | AMQ74_00691      |
|                                  | cobyrinic acid a,c-diamide synthase                   | CbiA        | APG09_00248        | APG11_00907 | AMQ22_00486      | #N/A             |
| Cob(D)alamin adenosyltransferase | CobO                                                  | APG09_00030 | APG11_01177        | #N/A        | AMQ74_00180      |                  |
| Coenzyme B<br>synthesis          | Homoaconitase large subunit                           | aksD        | APG09_00668        | APG11_01219 | AMQ22_00743      | AMQ74_01277      |
|                                  | Homoaconitase small subunit                           | aksE        | APG09_00667        | APG11_01220 | AMQ22_00742      | AMQ74_01276      |
|                                  | homoisocitrate dehydrogenase                          | aksF        | APG09_00669        | APG11_01221 | AMQ22_00741      | #N/A             |
|                                  | homoisocitrate synthase                               | aksA        | APG09_00167        | APG11_01809 | #N/A             | #N/A             |
| F420<br>modification             | F420 alpha-L-glutamate ligase                         | cofF        | APG09_01181        | APG11_00877 | AMQ22_01190      | AMQ74_01207      |
|                                  | F420 gamma-L-glutamate ligase                         | cofE        | APG09_00852        | APG11_01498 | #N/A             | AMQ74_00403      |
|                                  | F420-0--gamma-glutamyl ligase                         |             | APG09_01382        | APG11_00439 | AMQ22_01674      | AMQ74_00639      |
| F420<br>synthesis<br>pathway     | 7,8-didemethyl-8-hydroxy-5-deazariboflavin synthase   | CofGH       | #N/A               | #N/A        | #N/A             | #N/A             |
|                                  | LPPG:Fo 2-phospho-L-lactate transferase               | CofD        | APG09_00851        | APG11_01499 | AMQ22_02011      | AMQ74_00402      |
|                                  | 2-phospho-L-lactate guanylyltransferase               | CofC        | APG09_00850        | APG11_01500 | AMQ22_02012      | #N/A             |
|                                  | transporter                                           |             | APG09_00853        | APG11_01497 | AMQ22_00811      | AMQ74_00404      |
| F420 usage                       | Coenzyme F420:NADPH oxidoreductase                    |             | APG09_00948        | APG11_00979 | AMQ22_01896      | AMQ74_01307      |
| NADPH<br>usage                   | Malonyl-CoA reductase (NADP)                          |             | APG09_00664        | APG11_01223 | AMQ22_00739      | AMQ74_00718      |
|                                  | Isocitrate dehydrogenase (NADP)                       |             | APG09_00881        | APG11_00983 | #N/A             | AMQ74_01301      |
| S layer                          | S layer protein                                       |             | APG09_00651        | APG11_00625 | AMQ22_01410      | AMQ74_00995      |
|                                  | S layer protein (peptidoglycan anchored)              |             | APG09_01383        | APG11_00438 | AMQ22_01673      | AMQ74_00638      |
|                                  | S-layer-related duplication domain-containing protein |             | #N/A               | APG11_01121 | #N/A             | #N/A             |
|                                  | S-layer structural protein                            |             | APG09_00793        | APG11_00176 | AMQ22_00529      | AMQ74_00947      |
